# Supplementary material
Source: PubMed Central journal article supplement (PMC4039036)
Supplement: NIHMS576967-supplement-FigS2.pdf [file NIHMS576967-supplement-FigS2.pdf]

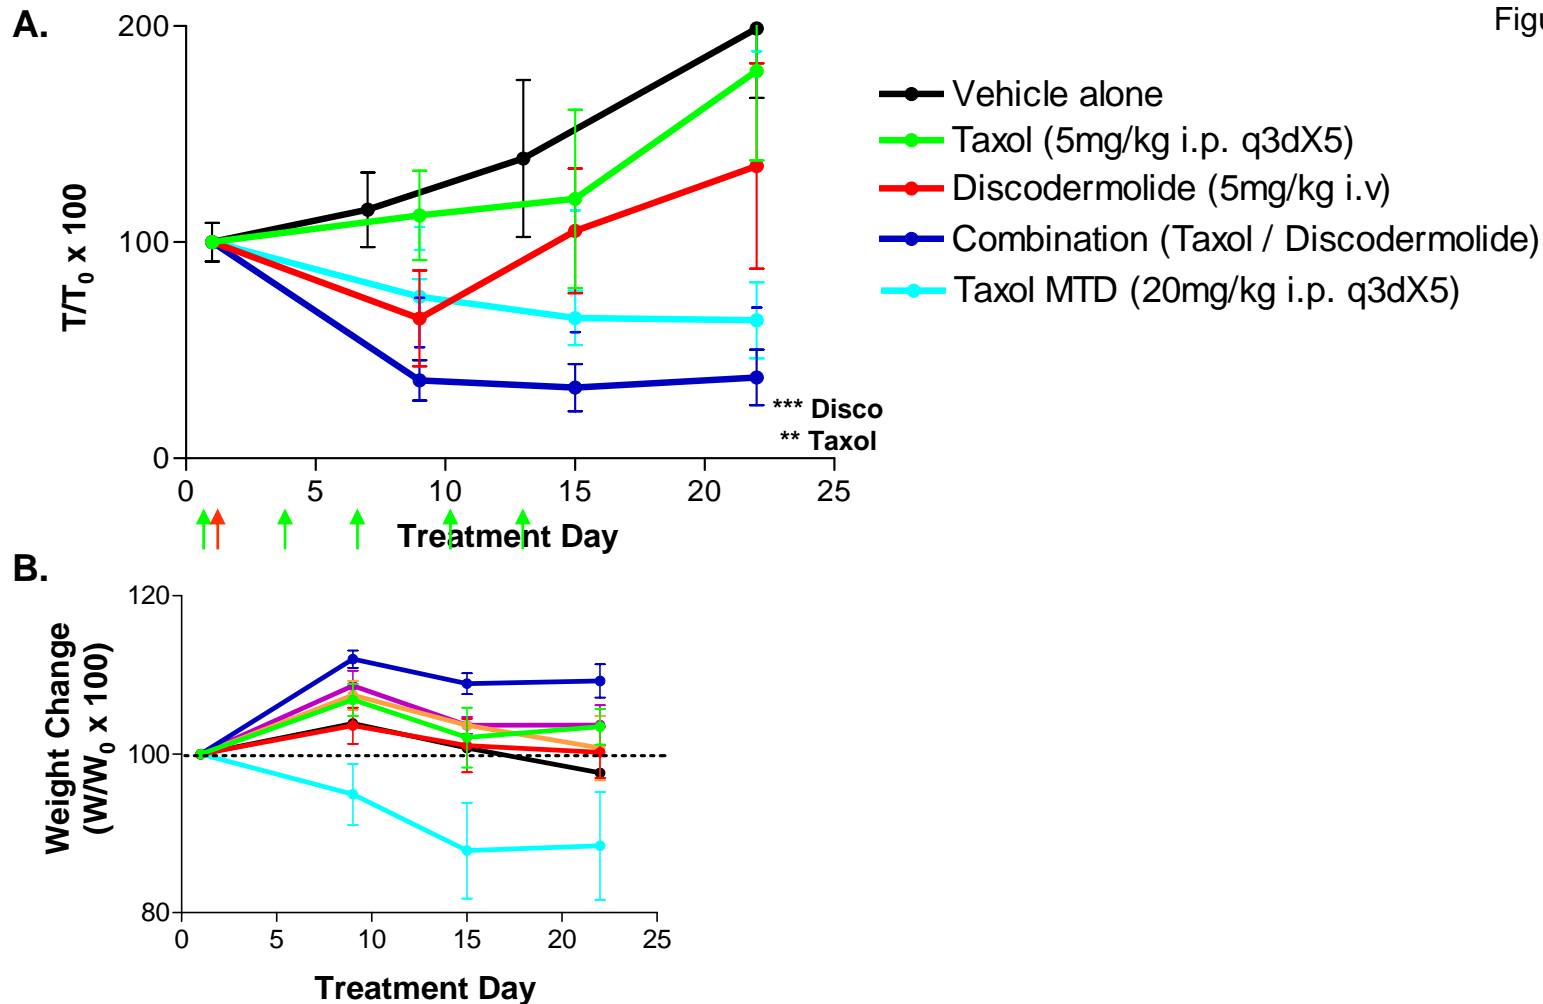

**Improved Anti-tumor Efficacy of Combined Taxol and Discodermolide Treatment Relative to Taxol at the MTD.** Nude mice bearing SKOV3 tumor xenografts were randomized into groups ( $n=6$ ) when tumor volumes were approximately  $100\text{mm}^3$  and treated with the various drugs, as described above. Note that Taxol and discodermolide in combination, were both administered on day 1. Taxol at the MTD of  $100\text{mg/kg}$  i.p. was administered over five doses given every three days. (A) Tumor volumes in the combination group were significantly smaller (two-tailed Student  $t$ -test) than single agent groups at 21 days post treatment. (B) Change in Weight of Drug-Treated mice. The combination treated group had no observable toxicities and gained weight throughout the duration of the experiment. However, animals treated with Taxol at the MTD had  $\sim 10 - 15\%$  weight loss.
